# Supplementary material
Source: PubMed Central journal article supplement (PMC4879376)
Supplement: AAC.00026-16_zac006165211so1.pdf [file AAC.00026-16_zac006165211so1.pdf]

SpoVG Regulates Cell Wall Metabolism and Oxacillin Resistance in  
Methicillin-Resistant *Staphylococcus aureus* Strain N315

Xiaoyu Liu<sup>1</sup>, Shijie Zhang<sup>1</sup>, Baolin Sun<sup>1,2\*</sup>

<sup>1</sup>CAS Key Laboratory of Innate Immunity and Chronic Disease, School of Life Sciences and Medical Center, University of Science and Technology of China, Hefei, Anhui, 230027, China

<sup>2</sup>Hefei National Laboratory for Physical Sciences at Microscale, Hefei, Anhui, 230027, China

Key words: Methicillin-Resistant *Staphylococcus aureus*, SpoVG, Cell Wall Metabolism, Oxacillin Resistance

Running title: SpoVG Regulates Oxacillin Resistance

\*Corresponding author. Tel.: 551-63606748; Fax: 551-63607438; Email: sunb@ustc.edu.cn

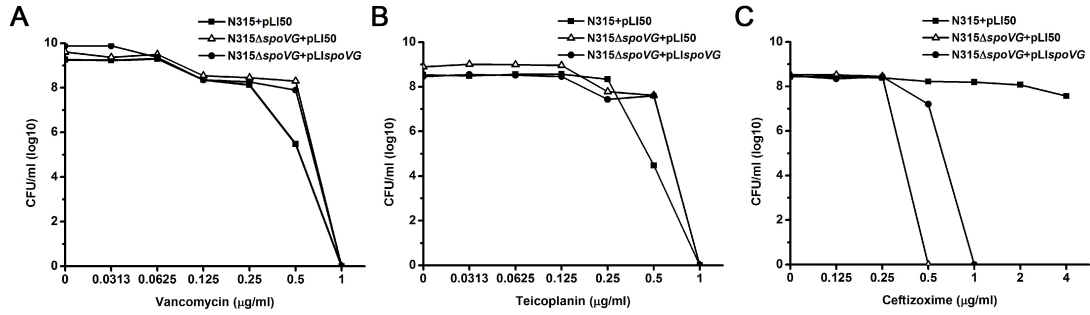

**Figure S1. Antibiotic susceptibility assay.** The antibiotic resistance levels were evaluated by population analysis profiles as recommended by the Clinical and Laboratory Standards Institute. The colonies were counted after incubation at 37°C for 24 hours. (A) and (B) There is no dramatic difference in vancomycin and teicoplanin resistance between the *spoVG* mutant (N315Δ*spoVG*+pLI50) and wide-type (N315+pLI50) strains. (C) Deletion of *spoVG* reduced ceftizoxime resistance in strain N315 and the complementary (N315Δ*spoVG*+pLI*spoVG*) strain has a partial effect.

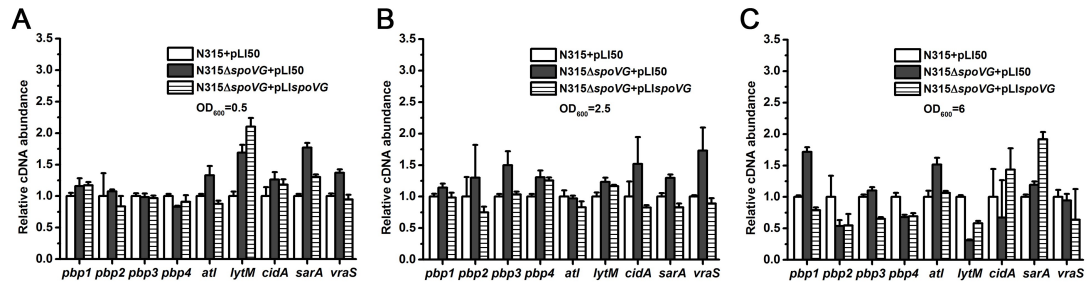

**Figure S2. Transcriptional analysis of cell wall-related genes.** Comparison of the relative transcription levels of several cell wall biosynthesis- and hydrolysis-related genes in the wild-type (N315+pLI50), the *spoVG* mutant (N315Δ*spoVG*+pLI50), and the *spoVG* complementary (N315Δ*spoVG*+pLI*spoVG*) strains. (A), (B), and (C) The relative transcription levels of *pbp1*, *pbp2*, *pbp3*, *pbp4*, *atl*, *lytM*, *cidA*, *sarA*, and *vraS* genes in early exponential (OD<sub>600</sub>=0.5), mid-logarithmic (OD<sub>600</sub>=2.5) and early stationary (OD<sub>600</sub>=6) phases were not significantly affected in the *spoVG* mutant (fold change < 2) except for *lytM* of early stationary phase.

Table S1. Primers used in this study

| Primer name                     | Oligonucleotide <sup>a</sup> (5'-3')                   | Application                              |
|---------------------------------|--------------------------------------------------------|------------------------------------------|
| <i>spoVG</i> -mutant-u<br>p-F   | GCGggtaccAATTGCCAGTATTTACATGG                          | pBTsΔ <i>spoVG</i> ,<br>pLI <i>spoVG</i> |
| <i>spoVG</i> -mutant-u<br>p-R   | <u>GCAAATGTATTACATCGCTACCCCCCTAT</u><br>AGTATATATCTC   | pBTsΔ <i>spoVG</i>                       |
| <i>spoVG</i> -mutant-d<br>own-F | TAGCGATGTAATACATTTGC                                   | pBTsΔ <i>spoVG</i>                       |
| <i>spoVG</i> -mutant-d<br>own-R | GCGgtcgacTATTCACCTTGCGCATTATC                          | pBTsΔ <i>spoVG</i>                       |
| P <i>spoVG</i> -R               | ACTAAACTCCTTTTATGAAAAC                                 | pLI <i>spoVG</i>                         |
| <i>spoVG</i> -complem<br>ent-F  | <u>TTCATAAAAGGAGTTTTAGTATGAAAGT</u><br>GACAGATGTAAGACT | pLI <i>spoVG</i>                         |
| <i>spoVG</i> -complem<br>ent-R  | GCGggtaccTGCCGACAAAGCTTTATGCT                          | pLI <i>spoVG</i>                         |
| SpoVG-exp-F                     | CATGccatgggAATGAAAGTGACAGATGTA<br>AGAC                 | pETSpovG                                 |
| SpoVG-exp-R                     | CCGctcgagAGCTTCTTCTGAATCTTCTGAT<br>GTAGC               | pETSpovG                                 |
| RTQ- <i>hu</i> -F               | AAAAAGAAGCTGGTTCAGCAGTAG                               | qRT-PCR                                  |
| RTQ- <i>hu</i> -R               | TTTACGTGCAGCACGTTAC                                    | qRT-PCR                                  |

Table S1-continued

| Primer name         | Oligonucleotide <sup>a</sup> (5'-3') | Application |
|---------------------|--------------------------------------|-------------|
| RTQ- <i>lytN</i> -F | TGACACCATTAGTAGAACCA                 | qRT-PCR     |
| RTQ- <i>lytN</i> -R | CATTGCCATCCATAACTACC                 | qRT-PCR     |
| RTQ- <i>lrgA</i> -F | TTATGCCAATTCCTATGC                   | qRT-PCR     |
| RTQ- <i>lrgA</i> -R | CGAAGAGTAAGCCAATG                    | qRT-PCR     |
| RTQ- <i>arlS</i> -F | CGAATGATAACACAGTGAGAG                | qRT-PCR     |
| RTQ- <i>arlS</i> -R | CTTGCGTTGTAATTGGTTCT                 | qRT-PCR     |
| RTQ- <i>lytS</i> -F | GGCACGAGAGTTACTATTAGA                | qRT-PCR     |
| RTQ- <i>lytS</i> -R | GCACGCACTTGACTTAAC                   | qRT-PCR     |
| RTQ- <i>sleI</i> -F | CACCAGTATTCAGTCACCAA                 | qRT-PCR     |
| RTQ- <i>sleI</i> -R | CAGTTATTAGCATTCCACCAAT               | qRT-PCR     |
| RTQ- <i>mecA</i> -F | CGACTTCACATCTATTAGGTTAT              | qRT-PCR     |
| RTQ- <i>mecA</i> -R | ACACGATAGCCATCTTCA                   | qRT-PCR     |
| RTQ- <i>femA</i> -F | ACACAACAAGCGAGATAAC                  | qRT-PCR     |
| RTQ- <i>femA</i> -R | CAGCAGAGATAGGTAATTCATT               | qRT-PCR     |
| RTQ- <i>blaZ</i> -F | TTTCCATTTGCGATAAGTTT                 | qRT-PCR     |
| RTQ- <i>blaZ</i> -R | TCCAGTTAGATATGAGATAGAAT              | qRT-PCR     |
| RTQ- <i>lytM</i> -F | CATTCGTAGATGCTCAAGGA                 | qRT-PCR     |
| RTQ- <i>lytM</i> -R | CTCGCTGTGTAGTCATTGT                  | qRT-PCR     |
| RTQ- <i>cidA</i> -F | GCAGTCATTATCATAGGAA                  | qRT-PCR     |
| RTQ- <i>cidA</i> -R | CATTCATAAGCGTCTACA                   | qRT-PCR     |

Table S1-continued

| Primer name             | Oligonucleotide <sup>a</sup> (5'-3') | Application |
|-------------------------|--------------------------------------|-------------|
| RTQ- <i>atl</i> -F      | AGCACCAACGGATTAC                     | qRT-PCR     |
| RTQ- <i>atl</i> -R      | CATACTCAGCACTGTCT                    | qRT-PCR     |
| RTQ- <i>sarA</i> -F     | GTGCATTAACAAGAATTAATACAGT            | qRT-PCR     |
| RTQ- <i>sarA</i> -R     | TTGACATACATCAGCGAAAAC                | qRT-PCR     |
| RTQ- <i>pbp2</i> -F     | ATGGTGTATCTGGAGTAA                   | qRT-PCR     |
| RTQ- <i>pbp2</i> -R     | CATAGTGTATTGAGGTGTAA                 | qRT-PCR     |
| RTQ- <i>pbp4</i> -F     | TATGAACAATAAGTGCTAATCC               | qRT-PCR     |
| RTQ- <i>pbp4</i> -R     | GACCTCCAACGTAGAAAG                   | qRT-PCR     |
| RTQ- <i>vraS</i> -F     | TGGTCTAATGGTGGTTCT                   | qRT-PCR     |
| RTQ- <i>vraS</i> -R     | CTTCACGATTCTGTTAGTCA                 | qRT-PCR     |
| <i>plytN</i> -F         | AGTTAAAAGATGATATAAAT                 | EMSA        |
| <i>plytN</i> -R-biotin  | AGCGTACTTTACTTTGTTGT                 | EMSA        |
| <i>plytN</i> -R         | AGCGTACTTTACTTTGTTGT                 | EMSA        |
| <i>pfemA</i> -F         | TAATATGAGCAAACCCAAACG                | EMSA        |
| <i>pfemA</i> -R-biotin  | AGGCACCAAACCTCTTTAGC                 | EMSA        |
| <i>pfemA</i> -R         | AGGCACCAAACCTCTTTAGC                 | EMSA        |
| <i>plytSR</i> -F        | GATTAGAAACTGTTGGCAAAG                | EMSA        |
| <i>plytSR</i> -R-biotin | TTGTTAGCGATAGCACGATA                 | EMSA        |
| <i>plytSR</i> -R        | TTGTTAGCGATAGCACGATA                 | EMSA        |

Table S1-continued

| Primer name         | Oligonucleotide <sup>a</sup> (5'-3') | Application |
|---------------------|--------------------------------------|-------------|
| RTQ- <i>pbp1</i> -F | AGTCAGCGACCAACATT                    | qRT-PCR     |
| RTQ- <i>pbp1</i> -R | AAGCACCTTCTTGAATAGC                  | qRT-PCR     |
| RTQ- <i>pbp3</i> -F | TTCAGCCGTATCCAACATT                  | qRT-PCR     |
| RTQ- <i>pbp3</i> -R | GTGCCAAGAGGTCGTATT                   | qRT-PCR     |

<sup>a</sup> Lowercase letters indicate restriction sites. Underlined letters indicate overlap sequences used for SLiCE.
